# Supplementary material for: Z-scheme photocatalyst systems employing Rh- and Ir-doped metal oxide materials for water splitting under visible light irradiation
Source: Royal Society of Chemistry journal article supplement (doi:10.1039/c8fd00209f), 2019-01-01
Supplement: c8fd00209f1.pdf [file c8fd00209f1.pdf]

## Supporting Information

### **Z-scheme photocatalyst systems employing Rh- and Ir-doped metal oxide materials for water splitting under visible light irradiation**

Akihiko Kudo,<sup>1,2\*</sup> Shunya Yoshino,<sup>1</sup> Taichi Tsuchiya,<sup>1</sup> Yuhei Udagawa,<sup>1</sup> Yukihiro Takahashi,<sup>1</sup> Masaharu Yamaguchi,<sup>1</sup> Ikue Ogasawara,<sup>1</sup> Hiroe Matsumoto<sup>1</sup> and Akihide Iwase<sup>1,2</sup>

<sup>1</sup>Department of Applied Chemistry, Faculty of Science, Tokyo University of Science, 1-3 Kagurazaka, Shinjuku-ku, Tokyo 162-8601, Japan

<sup>2</sup>Photocatalysis international Research Center, Research Institute for Science and Technology, Tokyo University of Science, 2641, Yamazaki Noda-shi, Chiba-ken 278-8510, Japan

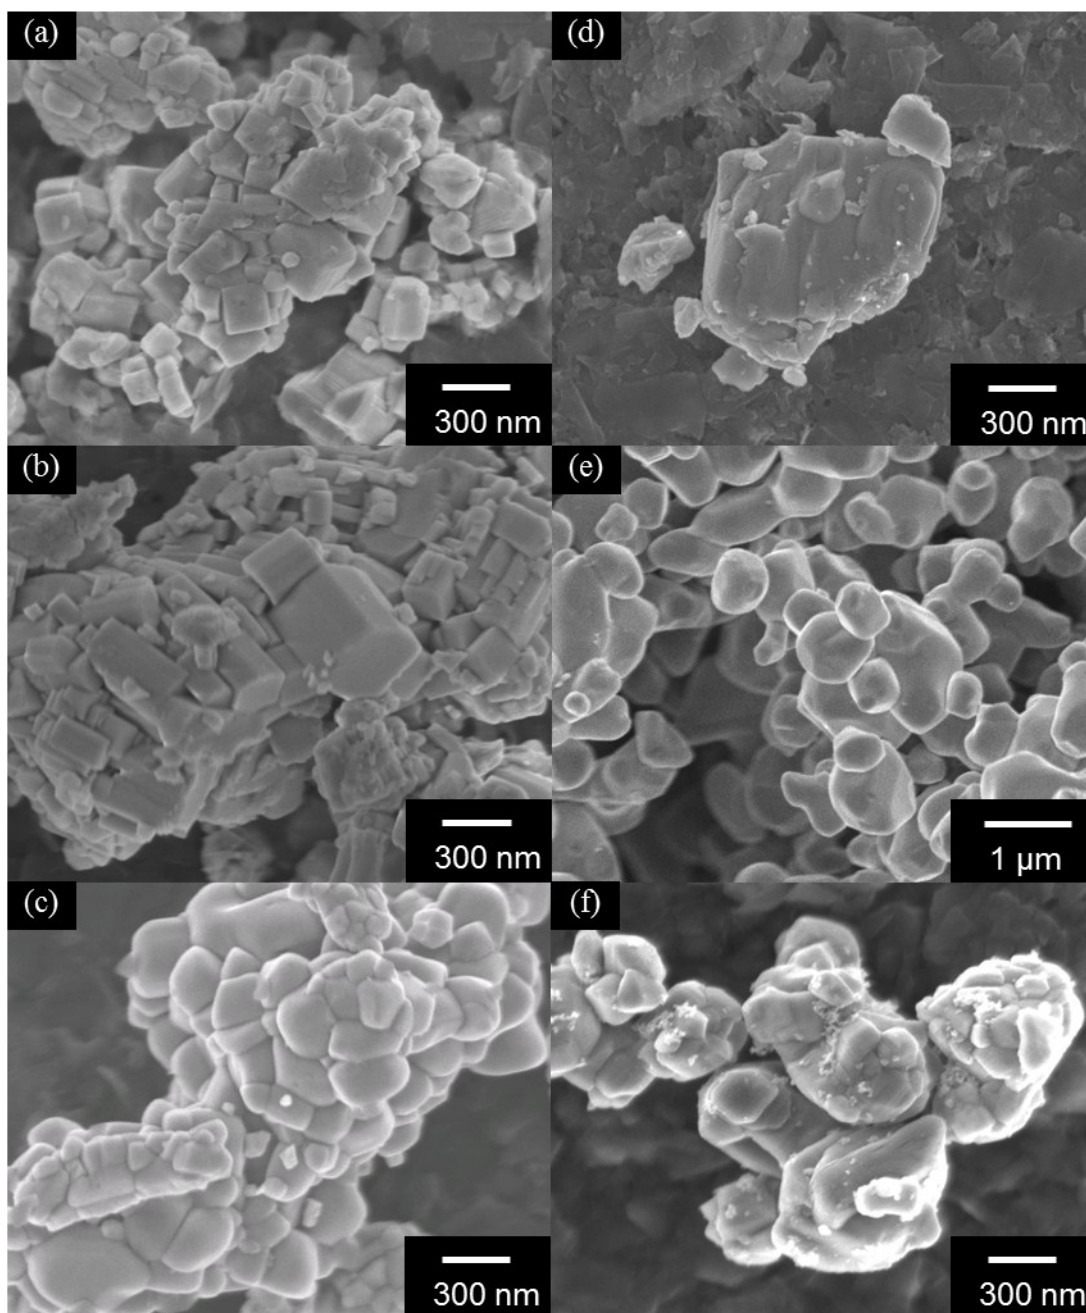

**Figure S1** SEM images of (a)  $\text{NaTaO}_3\text{:Ir}(1\%),\text{La}(2\%)$ , (b)  $\text{BaTa}_2\text{O}_6\text{:Ir}(1\%),\text{La}(2\%)$ , (c)  $\text{SrTiO}_3\text{:Ir}(0.2\%)$ , (d)  $\text{NaNbO}_3\text{:Rh}(1\%),\text{Ba}(2\%)$ , (e)  $\text{TiO}_2\text{:Rh}(0.5\%),\text{Sb}(1\%)$  and (f)  $\text{Ru/SrTiO}_3\text{:Rh}(1\%)$ .
